# Supplementary material for: Ethical review of COVID-19 research in the Netherlands; a mixed-method evaluation among medical research ethics committees and investigators
Source: PubMed Central journal article supplement (PMC8301608; doi:10.1371/journal.pone.0255040), 2021-07-23
Supplement: pone.0255040.s007.pdf [file pone.0255040.s007.pdf]

## COREQ Checklist (Tong 2007)

**Medical ethical review of COVID-19 reserach in the Netherlands;  
a mixed-method evaluation among Medical Research Ethics Committees and investigators**

| No | Item                                          | Guide questions/description                                                                                                                                     | Reported (page no)                  |
|----|-----------------------------------------------|-----------------------------------------------------------------------------------------------------------------------------------------------------------------|-------------------------------------|
|    | <b>Domain 1: Research team an reflexivity</b> |                                                                                                                                                                 |                                     |
|    | <i>Personal characteristics</i>               |                                                                                                                                                                 |                                     |
| 1  | Interviewer/facilitator                       | Which author/s conducted the interview or focus group?                                                                                                          | page 7 table 1                      |
| 2  | Credentials                                   | What were the researcher's credentials? <i>E.g. PhD, MD</i>                                                                                                     | page 7 table 1                      |
| 3  | Occupation                                    | What was their occupation at the time of the study?                                                                                                             | page 7 table 1                      |
| 4  | Gender                                        | Was the researcher male or female?                                                                                                                              | page 7 table 1                      |
| 5  | Experience and training                       | What experience or training did the researcher have?                                                                                                            | page 7 table 1                      |
|    | <i>Relationship with participants</i>         |                                                                                                                                                                 |                                     |
| 6  | Relationship established                      | Was a relationship established prior to study commencement?                                                                                                     | page 7 table 1, page 22 limitations |
| 7  | Participant knowledge of the interviewer      | What did the participants know about the researcher? <i>e.g. personal goals, reasons for doing the research</i>                                                 | page 7 table 1, page 22 limitations |
| 8  | Interviewer characteristics                   | What characteristics were reported about the interviewer/facilitator? <i>e.g. Bias, assumptions, reasons and interests in the research topic</i>                | page 7 table 1                      |
|    | <b>Domain 2: Study design</b>                 |                                                                                                                                                                 |                                     |
|    | <i>Theoretical framework</i>                  |                                                                                                                                                                 |                                     |
| 9  | Methodological orientation and Theory         | What methodological orientation was stated to underpin the study? <i>e.g. grounded theory, discourse analysis, ethnography, phenomenology, content analysis</i> | Page 6, Design                      |
|    | <i>Participant selection</i>                  |                                                                                                                                                                 |                                     |
| 10 | Sampling                                      | How were participants selected? <i>e.g. purposive, convenience, consecutive, snowball</i>                                                                       | Page 6 data collection              |

|    |                                        |                                                                                          |                                                             |
|----|----------------------------------------|------------------------------------------------------------------------------------------|-------------------------------------------------------------|
| 11 | Method of approach                     | How were participants approached? e.g. <i>face-to-face, telephone, mail, email</i>       | Page 6 data collection                                      |
| 12 | Sample size                            | How many participants were in the study?                                                 | Page 9 quantitative results and page 12 qualitative results |
| 13 | Non-participation                      | How many people refused to participate or dropped out? Reasons?                          | Page 7 data collection                                      |
|    | <i>Setting</i>                         |                                                                                          |                                                             |
| 14 | Setting of data collection             | Where was the data collected? e.g. <i>home, clinic, workplace</i>                        | Page 7 data collection                                      |
| 15 | Presence of non-participants           | Was anyone else present besides the participants and researchers?                        | Page 8 Data collection                                      |
| 16 | Description of sample                  | What are the important characteristics of the sample? e.g. <i>demographic data, date</i> | Table 1                                                     |
|    | <i>Data collection</i>                 |                                                                                          |                                                             |
| 17 | Interview guide                        | Were questions, prompts, guides provided by the authors? Was it pilot tested?            | Table 2a and 2b Topic lists                                 |
| 18 | Repeat interviews                      | Were repeat interviews carried out? If yes, how many?                                    | Page 7 data collection                                      |
| 19 | Audio/visual recording                 | Did the research use audio or visual recording to collect the data?                      | Page 8 data collection                                      |
| 20 | Field notes                            | Were field notes made during and/or after the interview or focus group?                  | Page 8 data collection                                      |
| 21 | Duration                               | What was the duration of the interviews or focus group?                                  | Table 1                                                     |
| 22 | Data saturation                        | Was data saturation discussed?                                                           | Page 22 Discussion                                          |
| 23 | Transcripts returned                   | Were transcripts returned to participants for comment and/or correction?                 | Page 8 data collection                                      |
|    |                                        |                                                                                          |                                                             |
|    | <b>Domain 3: analysis and findings</b> |                                                                                          |                                                             |
|    | <i>Data analysis</i>                   |                                                                                          |                                                             |
| 24 | Number of data coders                  | How many data coders coded the data?                                                     | Page 8 Data analysis                                        |
| 25 | Description of the coding tree         | Did authors provide a description of the coding tree?                                    | Table 5                                                     |
| 26 | Derivation of themes                   | Were themes identified in advance or derived from the data?                              | Page 8 Data analysis                                        |
| 27 | Software                               | What software, if applicable, was used to manage the data?                               | Page 8 Data analysis                                        |
| 28 | Participant checking                   | Did participants provide feedback on the findings?                                       | Page 8 data collection                                      |
|    | <i>Reporting</i>                       |                                                                                          |                                                             |

|    |                              |                                                                                                                                          |                 |
|----|------------------------------|------------------------------------------------------------------------------------------------------------------------------------------|-----------------|
| 29 | Quotations presented         | Were participant quotations presented to illustrate the themes / findings? Was each quotation identified? e.g. <i>participant number</i> | Results section |
| 30 | Data and findings consistent | Was there consistency between the data presented and the findings?                                                                       | Results section |
| 31 | Clarity of major themes      | Were major themes clearly presented in the findings?                                                                                     | Results section |
| 32 | Clarity of minor themes      | Is there a description of diverse cases or discussion of minor themes?                                                                   | Results section |
