# Supplementary material for: Ethical review of COVID-19 research in the Netherlands; a mixed-method evaluation among medical research ethics committees and investigators
Source: PubMed Central journal article supplement (PMC8301608; doi:10.1371/journal.pone.0255040), 2021-07-23
Supplement: pone.0255040.s009.pdf [file pone.0255040.s009.pdf]

# PLOS ONE

## Medical ethical review of COVID-19 research in the Netherlands; a mixed-method evaluation among Medical Research Ethics Committees and investigators --Manuscript Draft--

|                                                                                                                                                                                                                            |                                                                                                                                                                                                                                                                                                                                                                                                                                                                                                                                                                                                                                                                                                                                                                                                                                                                                                                                                                                                                                                                                                                                                                                                                                                                                                                                                                                                                                                                                                                                                                                                                                                                                                                                                                                                                                                                                                                                                                                                                                                                                                                                                                                                  |
|----------------------------------------------------------------------------------------------------------------------------------------------------------------------------------------------------------------------------|--------------------------------------------------------------------------------------------------------------------------------------------------------------------------------------------------------------------------------------------------------------------------------------------------------------------------------------------------------------------------------------------------------------------------------------------------------------------------------------------------------------------------------------------------------------------------------------------------------------------------------------------------------------------------------------------------------------------------------------------------------------------------------------------------------------------------------------------------------------------------------------------------------------------------------------------------------------------------------------------------------------------------------------------------------------------------------------------------------------------------------------------------------------------------------------------------------------------------------------------------------------------------------------------------------------------------------------------------------------------------------------------------------------------------------------------------------------------------------------------------------------------------------------------------------------------------------------------------------------------------------------------------------------------------------------------------------------------------------------------------------------------------------------------------------------------------------------------------------------------------------------------------------------------------------------------------------------------------------------------------------------------------------------------------------------------------------------------------------------------------------------------------------------------------------------------------|
| <b>Manuscript Number:</b>                                                                                                                                                                                                  | PONE-D-21-05904                                                                                                                                                                                                                                                                                                                                                                                                                                                                                                                                                                                                                                                                                                                                                                                                                                                                                                                                                                                                                                                                                                                                                                                                                                                                                                                                                                                                                                                                                                                                                                                                                                                                                                                                                                                                                                                                                                                                                                                                                                                                                                                                                                                  |
| <b>Article Type:</b>                                                                                                                                                                                                       | Research Article                                                                                                                                                                                                                                                                                                                                                                                                                                                                                                                                                                                                                                                                                                                                                                                                                                                                                                                                                                                                                                                                                                                                                                                                                                                                                                                                                                                                                                                                                                                                                                                                                                                                                                                                                                                                                                                                                                                                                                                                                                                                                                                                                                                 |
| <b>Full Title:</b>                                                                                                                                                                                                         | Medical ethical review of COVID-19 research in the Netherlands; a mixed-method evaluation among Medical Research Ethics Committees and investigators                                                                                                                                                                                                                                                                                                                                                                                                                                                                                                                                                                                                                                                                                                                                                                                                                                                                                                                                                                                                                                                                                                                                                                                                                                                                                                                                                                                                                                                                                                                                                                                                                                                                                                                                                                                                                                                                                                                                                                                                                                             |
| <b>Short Title:</b>                                                                                                                                                                                                        | Medical ethical review of COVID-19 research in the Netherlands                                                                                                                                                                                                                                                                                                                                                                                                                                                                                                                                                                                                                                                                                                                                                                                                                                                                                                                                                                                                                                                                                                                                                                                                                                                                                                                                                                                                                                                                                                                                                                                                                                                                                                                                                                                                                                                                                                                                                                                                                                                                                                                                   |
| <b>Corresponding Author:</b>                                                                                                                                                                                               | Roelie IJkema, MSc<br>Amsterdam UMC - Locatie VUMC: Amsterdam UMC Locatie VUmc<br>Amsterdam, NETHERLANDS                                                                                                                                                                                                                                                                                                                                                                                                                                                                                                                                                                                                                                                                                                                                                                                                                                                                                                                                                                                                                                                                                                                                                                                                                                                                                                                                                                                                                                                                                                                                                                                                                                                                                                                                                                                                                                                                                                                                                                                                                                                                                         |
| <b>Keywords:</b>                                                                                                                                                                                                           | ethical review; COVID-19 research                                                                                                                                                                                                                                                                                                                                                                                                                                                                                                                                                                                                                                                                                                                                                                                                                                                                                                                                                                                                                                                                                                                                                                                                                                                                                                                                                                                                                                                                                                                                                                                                                                                                                                                                                                                                                                                                                                                                                                                                                                                                                                                                                                |
| <b>Abstract:</b>                                                                                                                                                                                                           | <p>Background During the beginning of the COVID-19 pandemic there was urgent need for accelerated review of COVID-19 research by Medical research Ethics Committees (MRECs). In the Netherlands this led to implementation of so-called 'fast-track-review-procedures' (FTRPs) to enable a rapid start of urgent and relevant research. The objective of this study was to evaluate FTRPs of MRECs in the Netherlands during the COVID-19 pandemic. Methods and findings An explanatory sequential mixed method study was conducted. Online questionnaires and in-depth interviews were conducted among MREC representatives and investigators of COVID-19 research. In addition, data from a national research registration system was requested. Main outcome measures were differences in timelines, quality of the review and satisfaction between FTRPs and Regular Review Procedures (RRP). The total number of review days was shorter in FTRP (median 10.5) compared to RRP (median 98.0). Review days attributable to the MRECs also declined in FTRPs (median 8.0 versus 50.0). This shortening can be explained by motivated and flexible ad hoc (sub)committees and secretariats, the sense of urgency of those involved, full priority given to COVID-19 research, regular research put on hold due to COVID-19 measures, the use of online video meetings and administrative leniency. The shorter timelines did not affect the quality of the review. Both MREC representatives as well as investigators were generally satisfied with the review of COVID-19 research. Points of improvement identified were the lack of overview of COVID-19 research, better central collaboration and coordination, and the high workload for MREC members and secretariats. Conclusions To improve future medical ethical review during pandemic situations and beyond we recommend to improve (inter)national collaboration and coordination, to improve communication between MRECs and investigators, to reconsider administrative requirements to the application documents, to make use of digital possibilities and to pay attention to workload of MREC members and secretariats.</p> |
| <b>Order of Authors:</b>                                                                                                                                                                                                   | Roelie IJkema, MSc<br>MJPA Janssens<br>JAM van der Post<br>CM Licht                                                                                                                                                                                                                                                                                                                                                                                                                                                                                                                                                                                                                                                                                                                                                                                                                                                                                                                                                                                                                                                                                                                                                                                                                                                                                                                                                                                                                                                                                                                                                                                                                                                                                                                                                                                                                                                                                                                                                                                                                                                                                                                              |
| <b>Additional Information:</b>                                                                                                                                                                                             |                                                                                                                                                                                                                                                                                                                                                                                                                                                                                                                                                                                                                                                                                                                                                                                                                                                                                                                                                                                                                                                                                                                                                                                                                                                                                                                                                                                                                                                                                                                                                                                                                                                                                                                                                                                                                                                                                                                                                                                                                                                                                                                                                                                                  |
| <b>Question</b>                                                                                                                                                                                                            | <b>Response</b>                                                                                                                                                                                                                                                                                                                                                                                                                                                                                                                                                                                                                                                                                                                                                                                                                                                                                                                                                                                                                                                                                                                                                                                                                                                                                                                                                                                                                                                                                                                                                                                                                                                                                                                                                                                                                                                                                                                                                                                                                                                                                                                                                                                  |
| <b>Financial Disclosure</b>                                                                                                                                                                                                | The author(s) received no specific funding for this work                                                                                                                                                                                                                                                                                                                                                                                                                                                                                                                                                                                                                                                                                                                                                                                                                                                                                                                                                                                                                                                                                                                                                                                                                                                                                                                                                                                                                                                                                                                                                                                                                                                                                                                                                                                                                                                                                                                                                                                                                                                                                                                                         |
| Enter a financial disclosure statement that describes the sources of funding for the work included in this submission. Review the <a href="#">submission guidelines</a> for detailed requirements. View published research |                                                                                                                                                                                                                                                                                                                                                                                                                                                                                                                                                                                                                                                                                                                                                                                                                                                                                                                                                                                                                                                                                                                                                                                                                                                                                                                                                                                                                                                                                                                                                                                                                                                                                                                                                                                                                                                                                                                                                                                                                                                                                                                                                                                                  |

articles from [PLOS ONE](#) for specific examples.

This statement is required for submission and **will appear in the published article** if the submission is accepted. Please make sure it is accurate.

#### Unfunded studies

Enter: *The author(s) received no specific funding for this work.*

#### Funded studies

Enter a statement with the following details:

- Initials of the authors who received each award
- Grant numbers awarded to each author
- The full name of each funder
- URL of each funder website
- Did the sponsors or funders play any role in the study design, data collection and analysis, decision to publish, or preparation of the manuscript?
- **NO** - Include this sentence at the end of your statement: *The funders had no role in study design, data collection and analysis, decision to publish, or preparation of the manuscript.*
- **YES** - Specify the role(s) played.

\* typeset

#### Competing Interests

Use the instructions below to enter a competing interest statement for this submission. On behalf of all authors, disclose any [competing interests](#) that could be perceived to bias this work—acknowledging all financial support and any other relevant financial or non-financial competing interests.

This statement is **required** for submission and **will appear in the published article** if the submission is accepted. Please make sure it is accurate and that any funding sources listed in your Funding Information later in the submission form are also declared in your Financial Disclosure statement.

The authors have declared that no competing interests exist.

View published research articles from [PLOS ONE](#) for specific examples.

#### **NO authors have competing interests**

Enter: *The authors have declared that no competing interests exist.*

#### **Authors with competing interests**

Enter competing interest details beginning with this statement:

*I have read the journal's policy and the authors of this manuscript have the following competing interests: [insert competing interests here]*

\* typeset

#### **Ethics Statement**

Enter an ethics statement for this submission. This statement is required if the study involved:

- Human participants
- Human specimens or tissue
- Vertebrate animals or cephalopods
- Vertebrate embryos or tissues
- Field research

Write "N/A" if the submission does not require an ethics statement.

General guidance is provided below. Consult the [submission guidelines](#) for detailed instructions. **Make sure that all information entered here is included in the Methods section of the manuscript.**

The Central Committee involving Human Subjects (CCMO) approved the study on 23rd April 2020.

All participants were provided with written information about the study and gave informed consent in the online questionnaire.

**Format for specific study types**

**Human Subject Research (involving human participants and/or tissue)**

- Give the name of the institutional review board or ethics committee that approved the study
- Include the approval number and/or a statement indicating approval of this research
- Indicate the form of consent obtained (written/oral) or the reason that consent was not obtained (e.g. the data were analyzed anonymously)

**Animal Research (involving vertebrate animals, embryos or tissues)**

- Provide the name of the Institutional Animal Care and Use Committee (IACUC) or other relevant ethics board that reviewed the study protocol, and indicate whether they approved this research or granted a formal waiver of ethical approval
- Include an approval number if one was obtained
- If the study involved *non-human primates*, add *additional details* about animal welfare and steps taken to ameliorate suffering
- If anesthesia, euthanasia, or any kind of animal sacrifice is part of the study, include briefly which substances and/or methods were applied

**Field Research**

Include the following details if this study involves the collection of plant, animal, or other materials from a natural setting:

- Field permit number
- Name of the institution or relevant body that granted permission

**Data Availability**

Authors are required to make all data underlying the findings described fully available, without restriction, and from the time of publication. PLOS allows rare exceptions to address legal and ethical concerns. See the [PLOS Data Policy](#) and [FAQ](#) for detailed information.

Yes - all data are fully available without restriction

A Data Availability Statement describing where the data can be found is required at submission. Your answers to this question constitute the Data Availability Statement and **will be published in the article**, if accepted.

**Important:** Stating 'data available on request from the author' is not sufficient. If your data are only available upon request, select 'No' for the first question and explain your exceptional situation in the text box.

Do the authors confirm that all data underlying the findings described in their manuscript are fully available without restriction?

**Describe where the data may be found in full sentences. If you are copying our sample text, replace any instances of XXX with the appropriate details.**

- If the data are **held or will be held in a public repository**, include URLs, accession numbers or DOIs. If this information will only be available after acceptance, indicate this by ticking the box below. For example: *All XXX files are available from the XXX database (accession number(s) XXX, XXX).*
- If the data are all contained **within the manuscript and/or Supporting Information files**, enter the following: *All relevant data are within the manuscript and its Supporting Information files.*
- If neither of these applies but you are able to provide **details of access elsewhere**, with or without limitations, please do so. For example:

*Data cannot be shared publicly because of [XXX]. Data are available from the XXX Institutional Data Access / Ethics Committee (contact via XXX) for researchers who meet the criteria for access to confidential data.*

*The data underlying the results presented in the study are available from (include the name of the third party*

The data underlying the results presented in the study can be requested from the researchers.

*and contact information or URL).*

- This text is appropriate if the data are owned by a third party and authors do not have permission to share the data.

\* typeset

Additional data availability information:

1 **Medical ethical review of COVID-19 research in the Netherlands; a**  
2 **mixed-method evaluation among Medical Research Ethics**  
3 **Committees and investigators**

4 **Authors:**

5 R Ijkema, MJPA Janssens, JAM van der Post, CM Licht

6 Medical Research Ethics Committee VU medical Center, OZW O8A-07, De Boelelaan 1109,  
7 1081 HV, Amsterdam, the Netherlands

8 R. Ijkema review officer Medical Research Ethics Committee, VU medical center

9 MJPA Janssens ethicist Medical Research Ethics Committee, VU medical center

10 JAM van der Post chair Medical Research Ethics Committee, VU medical center

11 CM Licht manager Medical Research Ethics Committee, VU medical center

12 Correspondence to: R. Ijkema [r.ijkema@amsterdamumc.nl](mailto:r.ijkema@amsterdamumc.nl)

13

14

15 **Abstract**

16 **Background**

17 During the beginning of the COVID-19 pandemic there was urgent need for accelerated review of  
18 COVID-19 research by Medical research Ethics Committees (MRECs). In the Netherlands this led to  
19 implementation of so-called ‘fast-track-review-procedures’ (FTRPs) to enable a rapid start of urgent  
20 and relevant research. The objective of this study was to evaluate FTRPs of MRECs in the  
21 Netherlands during the COVID-19 pandemic.

22

23 **Methods and findings**

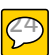

An explanatory sequential mixed method study was conducted. Online questionnaires and **in-depth**

**25 interviews were conducted among MREC representatives and investigators of COVID-19 research.** In

26 addition, data from a national research registration system was requested. Main outcome measures  
27 were differences in timelines, quality of the review and satisfaction between FTRPs and Regular  
28 Review Procedures (RRP). The total number of review days was shorter in FTRP (median 10.5)  
29 compared to RRP (median 98.0). Review days attributable to the MRECs also declined in FTRPs  
30 (median 8.0 versus 50.0). This shortening can be explained by motivated and flexible ad hoc  
31 (sub)committees and secretariats, the sense of urgency of those involved, full priority given to  
32 COVID-19 research, regular research put on hold due to COVID-19 measures, the use of online video  
33 meetings and administrative leniency. The shorter timelines did not affect the quality of the review.  
34 Both MREC representatives as well as investigators were generally satisfied with the review of  
35 COVID-19 research. Points of improvement identified were the lack of overview of COVID-19  
36 research, better central collaboration and coordination, and the high workload for MREC members  
37 and secretariats.

38



39 **Conclusions**

40 To improve future medical ethical review during pandemic situations and beyond we recommend to  
41 improve (inter)national collaboration and coordination, to improve communication between MRECs  
42 and investigators, to reconsider administrative requirements to the application documents, to make  
43 use of digital possibilities and to pay attention to workload of MREC members and secretariats.

44

45

## 46 Introduction

47 Since the beginning of 2020, the Netherlands has, like the rest of the world, been confronted with  
48 the COVID-19 pandemic caused by the SARS-CoV-2 virus [1]. Mortality, severe morbidity, the  
49 unfamiliarity with the virus and the lack of knowledge about adequate treatment, detection, spread  
50 and prophylaxis, has led to large-scale and urgent medical scientific research initiatives in order to fill  
51 these knowledge gaps. Many of the Medical Research Ethics Committees (MRECs) in the Netherlands  
52 (box 1) immediately recognized the need for accelerated review of COVID-19 research, which led to  
53 implementation of so-called ‘fast-track-review-procedures’ (FTRPs) to enable a rapid start of urgent  
54 and relevant research. However, it is unknown how timelines in these FTRPs exactly differ from  
55 those of the regular review procedure (RRP) and if certain review aspects were weighted differently.  
56 Also, it is unclear if quality of the review process differs between the FTRP and RRP.

### Box 1 Organisation and regulation of medical ethical review in the Netherlands

In addition to the central committee of human research (CCMO, supervisor, ethics committee, and competent authority), the Netherlands has 17 accredited Medical Research Ethics Committees (MREC) that review medical scientific research with human subjects [2]. Pursuant to the Dutch law ‘Algemene Wet Bestuursrecht’ (Dutch General Administrative Law Act), a so-called reasonable assessment period of 8 weeks (56 days) normally applies to medical and scientific research subject to the Dutch Wet-medisch-wetenschappelijk-onderzoek-met-mensen (WMO, Medical Research involving Human Subjects Act). The WMO prescribes a specific decision period of 60 days which applies to research with medicinal products [3].

57

58 Literature on previous evaluations among MRECs about ethical review of research during epidemics  
59 is relatively scarce. The Ethics Committee (EC) of the Henan Provincial People’s Hospital published an

60 overview of the review times of COVID-19-related research and issues encountered during the  
61 assessment [4]. Review processes and timelines of the Médecines Sans Frontières (MSF) ethics  
62 review board (ERB) during the Ebola Virus Disease (EVD) epidemic were described by Schopper *et al.*  
63 [5] Alirol *et al* described the review of the WHO ethics review committee (ERC) during the EVD  
64 epidemic [6].

65 The need for ethics committees' preparedness during outbreaks or epidemics was already  
66 emphasized earlier. Saxena *et al.* presented six recommendations resulting from a World Health  
67 Organization (WHO) workshop with representatives of 29 countries, aimed to identify practical  
68 processes and procedures to facilitate ethics review during an infectious disease outbreak [7]. They  
69 recommended, for example, that 'a national standard operating procedure (SOP) for emergency  
70 response ethical review should be developed and adopted by N(R)ECs and/or in-country competent  
71 authority' [7].

72 The present study evaluates the fast MREC review processes and timelines of COVID-19 related  
73 research in the Netherlands, including a description of in-depth insight into experiences of MREC  
74 representatives as well as investigators.

75

76

## 77 **Methods**

### 78 **Design**

79 An  investigator initiated explanatory sequential mixed method study was conducted. First  
80 quantitative data regarding timelines, review quality and satisfaction was collected. As an  
81 explanatory follow-up the quantitative results were further explained with  depth qualitative data  
82 [8].

### 83 **data collection**

 In the first quantitative phase, in May 2020, an online questionnaire containing questions about the  
85 **FTRP, timelines, experiences and satisfaction** was sent to chairs and secretariats of all MRECs in the  
86 **Netherlands**. Both chairs and secretaries were invited to fill out the questionnaire. Another  
87 questionnaire was sent to  **all investigators of COVID-19** related research registered with the  
88  **competent Authority** on 25<sup>th</sup> of April 2020. In addition, review timelines of these COVID-19 related  
89 studies as well as comparable regular studies from 2019 were requested from the national   
90 registration system of the Central Committee on Research Involving Human Subjects (CCMO) [9].

 In the second qualitative phase, all invitees to the questionnaire were asked to participate in **an in-**  
92 **depth group interview**. Four semi-structured online group interviews were conducted in June and  
93 July 2020 using Microsoft Teams: two group interviews with MREC representatives and two group  
94 interviews with COVID-19 investigators. Topic lists with open-ended questions were developed based  
95 on questionnaire results. Interviews were led by (anonymous) or (anonymous)  **in presence of other**  
96 **research team members**. Interviews were  **audio-taped** and  **transcribed verbatim**.

### 97 **data analysis**

98 Descriptive analyses of the quantitative data were performed using IBM SPSS Statistics 26.  
99 An initial code structure based on the topic lists was developed to analyse the qualitative data. After  
100 review of the transcripts, the code structure was discussed during research team meetings and

101 adjusted by modifying (sub)codes. Two researchers (anonymous and anonymous) independently  
102 coded all four transcripts using the qualitative research program MAXQDA version 2018.2.  
103 Interpretation of codes was discussed until agreement was reached. Decisions made in the discussion  
104 sessions were debated during regular research team meetings. All researchers agreed with the final  
105 encoded transcripts. Finally, all coded transcripts were analysed with help of the program MAXQDA  
106 in order to identify themes [8].

## 107 **Ethics**

108 This study was approved by the MO on 23<sup>rd</sup> April 2020. All participants were provided with written  
109 information about the study and gave rmed consent.

110

111

112

## 113 Results

### 114 Quantitative results

115  chairs and 18 secretariats of all 18 MRECs in the Netherlands were invited to fill out the online  
116 questionnaire. **23** fully completed questionnaires were returned, representing 17 of the 18 review

 committees in the Netherlands (94%). **21 of those 23 MREC respondents (91%), representing 16 of**

**118 the 17 responding MRECs, implemented a FTRP.**

119 Furthermore, 36 investigators were invited to fill out the questionnaire of which 20 responded (56%).

120 16 (80%) of those respondents also submitted another research file to an MREC in the RRP in the

121 past **5** years.

### 122 Implementation process

123 **7** MRECs established an 'ad-hoc subcommittee' to review the COVID-19 submissions. Other

124 formations that reviewed these submissions were, for example, the full regular committee (10

125 MRECs) or the daily board (3 MRECs). 19 (90%) of the MREC representatives indicated that it was not

126 difficult (at all) to involve committee members in the FTRP. 3 MRECs indicated they consulted

127 another MREC about their FTRP prior to implementation.

128 18 (86%) of the MREC representatives indicated that their MREC required submission of the same

129 documents as usual. However, 17 (81%) of the MREC representatives indicated that  certain

130 leniency was applied ~~with regard~~ to the completeness of the initial submission. ~~9 (45%) of the~~

131 investigators, however, did not notice any difference in leniency of the required documents

132 compared to the RRP and 2 (10%) indicated even less leniency.

### 133 Review timelines

134 Table 1 shows the median total number of days from complete submission to MREC approval was

135 10.5 days for COVID-19 research. Thereof,  median number of days attributable to the MRECs was

136 8.0 days.  comparison, for regular research, the median total number of days from complete

137 submission to MREC approval was 98.0 days with a the median number of days attributable to the

138 MRECs of 50 days.  
 139 16 (80%) investigators indicated that the review of their research went faster compared to regular  
 140 submissions.

| Table 1. Review times for COVID-19 research and regular research                                                                                                                                                       |                                                                        |                                                                            |
|------------------------------------------------------------------------------------------------------------------------------------------------------------------------------------------------------------------------|------------------------------------------------------------------------|----------------------------------------------------------------------------|
| Research files                                                                                                                                                                                                         | Total days from complete submission to MREC judgment<br>Median (range) | EC review days from complete submission to MREC judgment<br>Median (range) |
| COVID-19 research (N=28)<br> <i>ment between 13-3-2020 and 20-8-2020 and registered at 25-4-2020</i><br><i>(2 negative decisions)</i> | 10.5 (1-70)                                                            | 8.0 (1-56)                                                                 |
| Regular research (N=443)<br><i>judgment between 13-3-2019 and 20-8-2019 (0 negative decisions)</i>                                                                                                                     | 98.0 (1-363)                                                           | 50.0 (1-158)                                                               |

141

142 Review experiences

143 18 (90%) investigators were (very) satisfied about the review process of their COVID-19 research, as  
 144 were 19 (90%) of the MREC representatives

145 17 (85%) investigators felt their MREC took the urgency of the research into account and 16 (76%) of  
 146 the MREC representatives indicated that the urgency of the research has weighted heavily in their  
 147 review process.  19 (90%) of the MREC representatives indicated the quality of their review was equal  
 148 to regular review, but only 13 (62%) indicated their review was 'as strict as in the regular situation', 4  
 149 (19%) indicated the MREC reviewed 'less strict' and 1 (5%) 'stricter'. Table 2 shows the number of  
 150 respondents that indicated specific aspects were weighted differently in the FTRP.

151 There was no consensus among MREC representatives about the quality of the submitted research  
 152 files in the FTRP: 9 (43%) indicated the quality was 'equal', 7 (33%) 'worse', 1 (5%) 'better' and the

153 remainder had no opinion.  
 154 5 (24%) of the MREC respondents suggested the review of not COVID-19-related submissions to be  
 155 delayed due to the priority given to COVID-19 research.

**Table 2. No. of respondents that indicated specific aspects were weighted differently in the FTRP compared to the RRP**

| Review aspect          | No. of EC respondents | No. of investigators |
|------------------------|-----------------------|----------------------|
|                        | (%)                   | (%)                  |
| Burdening of subjects  | 0 (0%)                | 1 (5%)               |
| Legal aspects          | 2 (10%)               | 2 (10%)              |
| Privacy aspects        | 1 (5%)                | 0 (0%)               |
| Methodological aspects | 2 (10%)               | 4 (20%)              |
| Ethical aspects        | 1 (5%)                | 0 (0%)               |
| Subject information    | 1 (5%)                | 1 (5%)               |
| Administrative aspects | 8 (38%)               | 6 (30%)              |

156

157 **Qualitative results**

158 In total, four semi-structured group interviews were conducted with 10 MRECs representatives and 9  
 159 investigators. Interviews ranged in length from circa 45 minutes to 1 hour. Subthemes identified  
 160 were structured on the basis of the three main themes addressed in the interviews: 1.  
 161 Implementation process 2. Review timelines and 3. Review experiences.

162 **Implementation process**

163 In general, COVID-19 review (sub)committees were composed relatively easy due to a great sense of  
 164 urgency resulting in great willingness and flexibility of MREC members and secretariats. Working  
 165 remotely from home and using video conferences probably contributed to a rapid scheduling of  
 166 review meetings. Other measures taken to speed up the review process were frequent and



167 accessible contact between MREC representatives and investigators and verbal clarification of the  
168 committee's comments. Furthermore, although MRECs largely agreed that  research file had to be  
169 complete before approval of a study,  certain leniency concerning the completeness of initial  
170 submissions was applied to accelerate the review process. In addition, the obligation to submit a wet  
171 signature cover letter for primary submissions was suspended temporarily by the Competent  
172 Authority.

## 173 2. Review timelines

174 Although investigators were generally pleased with the review timelines and prioritization of COVID-  
175 19 research, they indicated that there was still room for improvement of timelines. Suggestions  
176 mentioned were for example giving preliminary feedback shortly after submission and improving  
177 cooperation with other stakeholders involved, for example legal departments, medical technology  
178 departments and (MRECs of) other participating centres.

179 MREC representatives also mentioned concerns about delayed appraisal of other research projects  
180 by giving full priority to COVID-19 research. In particular, the processing of amendments to regular  
181 research was mentioned to be significantly delayed. However, because much regular research was  
182 put on hold due to measures taken because of the pandemic, the consequences of this delay were  
183 minor.

## 184 3. Review experiences

### 185 Urgency:

186 Investigators indicated that fast timelines were crucial to be able to include enough patients, because  
187 the patient numbers were expected to decline ~~within a reasonable~~ time. The sense of urgency  
188 contributed to  re dedication by investigators which also contributed to a faster review process  
189 compared to the non-pandemic situation. Investigators regretted, however, that they felt not all  
190 stakeholders involved in the research process were equally aware of this urgency or had other

191 priorities related to the pandemic. Delays were particularly noted among legal, medical technology  
192 departments and participating centers.

### 193 Quality of research file:

194 Investigators were unanimously satisfied with the quality of their  research files which was said to  
195 only slightly differ in quality compared to regular research. Some even indicated an improvement  
196 compared to regular research because they were forced to keep the protocol simple and focused  
197 due to time pressure. MREC representatives however, mentioned that some research files would  
198 probably have improved with a few weeks more preparation time. Amendments to initial research

 protocols were submitted quickly. This was partly caused by the fact that new knowledge about  
200 COVID-19 became available every day and because extra centres had to be included in order to  
201 achieve the required inclusion rate.

### 202 Quality of review:

203 Investigators and MREC representatives agreed that the quality of the review was not different from  
204 usual. MREC respondents were positive about maintaining quality because carefulness should take  
205 precedence over speed, but investigators indicated a clearer distinction between  in and side  
206 issues would have been desirable.

### 207 Collaboration and coordination

208 Especially among MREC respondents a great need for collaboration and coordination between  
209  research projects was experienced. Many MRECs took the feasibility of the research projects into  
210 account, but they did not always have good overview of the availability of patients and possibilities in  
211 the hospital. MRECs were for example concerned about the considerable amount of human tissues  
212 that was collected per patient due to inclusion in multiple studies. On some locations this was solved  
213 by a central coordinating committee. But there were also concerns about conducting research that  
214 was already carried out elsewhere. It was not easy for MRECs to gain insight into this. Particularly for  
215 intervention studies, the short peak of the pandemic made it difficult to include enough participants.

216 More central management and collaboration between different research groups and MRECs could  
217 improve this. Furthermore, the respondents also felt room for improvement with regard to the  
 cooperation and coordination between MRECs. There is a need for a standard procedure that works  
219 nationally. Now each MREC implemented its own FTRP.

## 220 Communication

221 In general, there was clear communication about when an application should be submitted and  
222 discussed in an MREC meeting. However, according to investigators, it was not clear when a response  
223 from the MREC could be expected. Moreover, telephone reachability of the secretariats was poor  
224 due to working remotely. This lack of clarity and communication options in an urgent situation led to  
225 frustration among investigators. A designated contact person was recommended who can improve  
226 communication and limit inconsistency in advice.

## 227 Workload:

228 The FTRP meant a significant change to the working processes at the MREC secretariats. Daily routine  
229 changed dramatically overnight and workload increased. Besides the great flexibility that was  
230 required of both MREC members as secretaries, there was also social and scientific pressure to  
231 process everything very quickly. The little decline in regular work because of temporarily halted  
232 research projects helped to make it manageable. Logistics, all remote, were a burden on the  
233 secretariats.

234

235

## 236 Discussion

237 The objectives of the current research were to identify differences between the FTRP ~~en~~ RRP and to  
238 gain further insight into these differences and experiences with the FTRP. Results of this study show  
239 that review timelines of MRECs were on average more than four times as short in FTRPs. Mean  
240 number of review days of COVID-19 research from complete submission to MREC judgment was 11  
241 days versus 52 in the RRP. In comparison, the EC of the Henan Provincial People's Hospital in China  
242 reviewed COVID-19 research even faster. Mean number of days from application of submissions until  
243 an initial review decision was 2.13 days and review of resubmission took on average 1.81 days [4].  
244 During the EVD epidemic the WHO ERC reviewed EBV-related new submissions with an average of 15  
245 days from complete submission to final ERC approval [6] and the MSF ERC took on average 35 (range  
246  23-43) days from request to approval [5]. However, due to differences in composition and geography

247 these ECs are not completely comparable.

248 The shortening of the review timelines found in the present study, may be explained by very  
249 motivated and flexible ad hoc (sub)committees and secretariats, the sense of urgency of those  
250 involved, full priority given to COVID-19 research, regular research put on hold due to COVID-19  
251 measures, the use of online video meetings and administrative leniency, for example with regard to  
252 (wet) signatures. These changes did not affect the quality of the review. Moreover, the FTRP is  
253 associated with a high degree of satisfaction among both investigators as well as MREC members.

254 However, weaknesses faced by both investigators as MRECs were ~~a lack of~~ overview of ongoing  
255 studies and insufficient cooperation between researchers as well as MRECs of different institutions.  
256 This complicated an expedited review and a sufficient inclusion rate during a relatively short peak of  
257 the pandemic. Some institutions implemented a local COVID-19 coordinating committee to improve  
258 coordination and to protect the limited number of suitable patients from an excessive research  
259 burden. However, closer collaboration between investigators, institutions as well as MRECs is  
260 needed. This is endorsed by conclusions from previous papers [5, 6, 7, 10, 11].

261 The limited period of time in which sufficient patients were available for inclusion made an expedited  
 262 review all the more important. Short communication lines, a designated contact person, being easily  
 263 reachable, focus on essentials and increasing the sense of urgency in all involved in conducting the  
 264 research were identified as factors which can contribute to an even faster review process and thus to  
 265 a higher chance of reliable study outcomes. Improving these factors further could also contribute to  
 266 the quality of RRP. The full priority given to COVID-19 research sometimes resulted in delayed review  
 267 of (amendments to) regular research. These capacity issues should be taken into account, as was also  
 268 suggested by Ma et al. [11].

269 In conclusion, our study provided a comprehensive overview of the fast-track review of COVID-19  
 270 research in the Netherlands during the COVID-19 pandemic. Based on the strengths and weaknesses  
 271 of the FTRP described above, we have formulated recommendations for improving the review  
 272 procedure in the Netherlands, as shown in table 3.

| <b>Table 3. Recommendations</b>                                                                        |                                                       |                                                                                                               |
|--------------------------------------------------------------------------------------------------------|-------------------------------------------------------|---------------------------------------------------------------------------------------------------------------|
| <b>Recommendation</b>                                                                                  | <b>Target audience</b>                                |  <b>review procedure</b> |
|                                                                                                        |                                                       |                                                                                                               |
|                                                                                                        |                                                       |                                                                                                               |
| Improve (inter)national cooperation and collaborations between investigators of different institutions | MRECs, national (research) authorities, investigators | <b>FTRP</b>                                                                                                   |
| Implement a local coordinating committee                                                               | Institutions, MRECs                                   | <b>FTRP</b>                                                                                                   |

|                                                                                                                            |                                        |              |
|----------------------------------------------------------------------------------------------------------------------------|----------------------------------------|--------------|
| Ensure clear communication and good telephone reachability                                                                 | MRECs                                  | FTRP and RRP |
| Reconsider local regulations regarding administrative review aspects and local requirements regarding submission documents | National (research) authorities        | FTRP and RRP |
| Focus on major issues during designing, writing and reviewing research proposals                                           | Investigators, MRECs                   | FTRP and RRP |
| Offer the possibility to attend an MREC meeting digitally                                                                  | National (research) authorities, MRECs | FTRP and RRP |
| Investigate the possibilities of reducing workload                                                                         | National (research) authorities, MRECs | <b>FTRP</b>  |

273

274 However, the way in which medical ethical review is organized and regulated by law varies  
275 internationally. Therefore, we encourage more (expedited) review procedures to be evaluated and  
276 shared internationally. This can be a first step towards more international collaboration prior to and  
277 during an epidemic, in order to make optimal use of an inclusion peak.

278

279

280 **Acknowledgments**

281 The authors thank the CCMO for making data available for this research. They also thank Peter van  
282 de Ven, methodologist and Caroline Terwee, methodologist, for commenting on the design of the  
283 study and Michel Paardekooper, privacy officer, for his advice on data protection. Finally they thank  
284 Richard Dekhuijzen, chair MREC CMO Arnhem-Nijmegen and chair NVMETC, and Louis Bont, chair  
285 MREC Utrecht, and Jan Swinkels, chair MREC Academic Medical Center Amsterdam, for commenting  
286 on a draft of this paper.

287

## 288 References

- 289 1. RIVM. Actuele informatie over het coronavirus SARS-CoV-2. Available from:  
290 <https://www.rivm.nl/coronavirus-covid-19/actueel> [Accessed 24th December 2020].
- 291 2. CCMO. Available from: <https://english.ccmo.nl/mreccs/accredited-mreccs> [Accessed 24th  
292 December 2020].
- 293 3. CCMO. Available from: [https://english.ccmo.nl/investigators/primary-submission-to-the-](https://english.ccmo.nl/investigators/primary-submission-to-the-review-committee/timelines-reviewing-committee)  
294 [review-committee/timelines-reviewing-committee](https://english.ccmo.nl/investigators/primary-submission-to-the-review-committee/timelines-reviewing-committee) [Accessed 24th December 2020].
- 295 4. Zhang H, Shao F, Gu J, Li L, Wang Y. Ethics Committee Reviews of Applications for Research  
296 Studies at 1 Hospital in China During the 2019 Novel Coronavirus Epidemic. *JAMA*  
297 2020;323(18):1844-1846.
- 298 5. Schopper D, Ravinetto R, Schwartz L, et al. Research Ethics Governance in Times of Ebola.  
299 *Public Health Ethics* 2017;10(1):49-61.
- 300 6. Alirol E, Kuesel AC, Guraiib MM, de la Fuente-Núñez V, Saxena A, Gomes MF. Ethics review of  
301 studies during public health emergencies – the experience of the WHO ethics review  
302 committee during the Ebola virus disease epidemic. *BMC Medical Ethics* 2017 18(1):43.
- 303 7. Saxena A, Horby P, Amuasi J, et al. the ALERRT-WHO Workshop Ethics preparedness:  
304 facilitating ethics review during outbreaks – recommendations from an expert panel. *BMC*  
305 *Medical Ethics* 2019 20(1):29.
- 306 8. Creswell JW, Creswell JD. *Research Design: qualitative, quantitative, and mixed methods*  
307 *approaches*. 5th edition. Los Angeles: SAGE publications; 2018.
- 308 9. CCMO. CCMO-register. Available from: <https://www.toetsingonline.nl> [Accessed 24<sup>th</sup>  
309 December 2020].
- 310 10. Aarons D. Research in epidemic and emergency situations: A model for collaboration and  
311 expediting ethics review in two Caribbean countries. *Developing World Bioethics*. 2018  
312 18(4):375-384.



- 313 11. Ma X, Wang Y, Gao T, et al. Challenges and strategies to research ethics in conducting COVID-  
314 19 research. *Journal of Evidence-Based Medicine*. 2020 13(2):173-177.
